# Supplementary material
Source: Springer Nature journal article supplement (https://www.springermedizin.de/resource/supplementary/12894_2012_218_MOESM4_ESM.pdf/9513234)

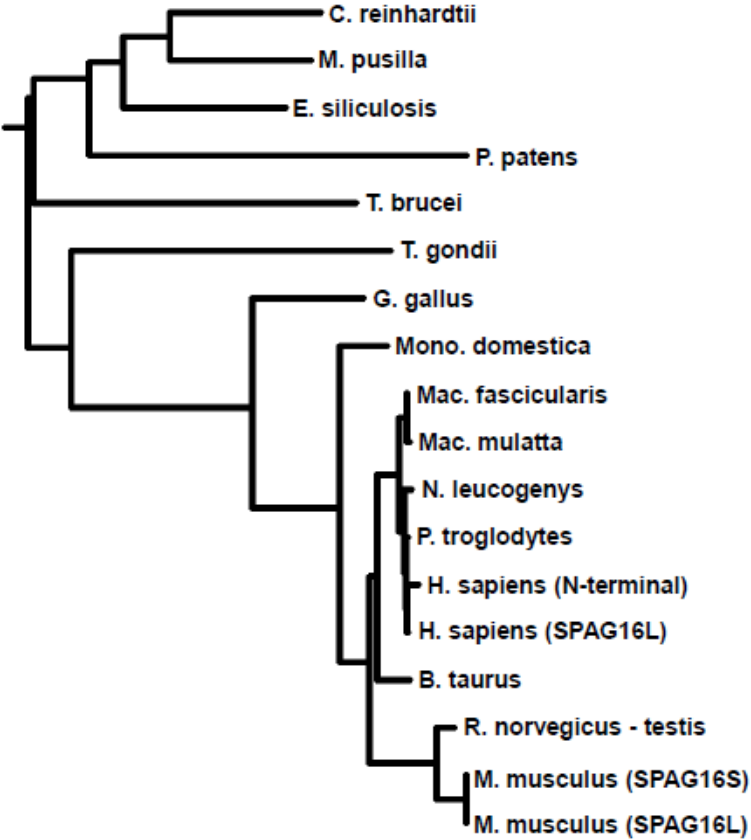

Supplement: MOESM4 [file 9513234]
